# Supplementary material
Source: PubMed Central journal article supplement (PMC8045163)
Supplement: Supplementary_Data.pdf [file Supplementary_Data.pdf]

Figure S1. Survival curves of patients with cervical cancer according to PD-L1 expression. (A) OS, (B) LC and (C) PFS curves of patients who were PD-L1 positive (n=4) or negative (n=71) in pre-RT samples. (D) OS, (E) LC and (F) PFS curves of patients who were PD-L1 positive (n=39) or negative (n=36) post-10 Gy. (G) OS, (H) LC and (I) PFS curves of patients depending on PD-L1 alterations, with PD-L1 expression decreased (n=2), unchanged (n=35) or increased (n=38) after CRT/RT. PD-L1, programmed death-ligand 1; CRT, chemoradiotherapy; RT, radiotherapy; OS, overall survival; LC, locoregional control; PFS, progression-free survival.

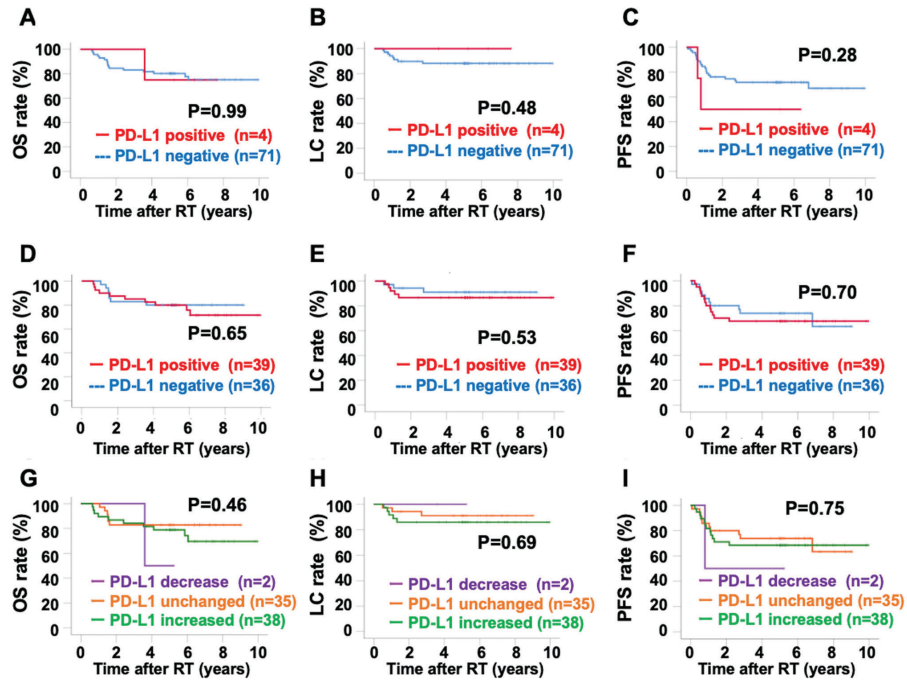

Figure S2. Receiver operating characteristics curve for density of stromal CD8<sup>+</sup> TILs to predict death or recurrence after RT. An analysis of the receiver operating characteristic curve was performed to determine the cut-off values for CD8<sup>+</sup> TILs. TIL, tumor-infiltrating lymphocyte; RT, radiotherapy; AUC, area under the curve.

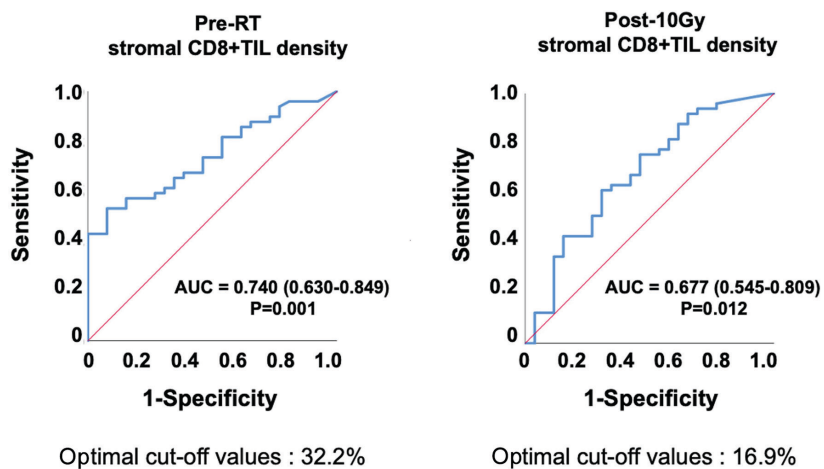

Figure S3. Survival curves of patients with cervical cancer according to PD-L1 expression and CD8<sup>+</sup> TILs alterations after 10 Gy RT. (A) OS, (B) LC and (C) PFS curves of patients depending on stromal CD8<sup>+</sup> TIL and PD-L1 alterations after 10 Gy RT. Results of statistical analyses are shown on the right. a, CD8<sup>+</sup> TIL increased-PD-L1 increased; b, CD8<sup>+</sup> TIL increased-PD-L1 unchanged/decreased; c, CD8<sup>+</sup> TIL decreased-PD-L1 increased; and d, CD8<sup>+</sup> TIL decreased-PD-L1 unchanged/decreased. OS, overall survival; LC, locoregional control; PFS, progression-free survival; PD-L1, programmed death-ligand 1; TIL, tumor-infiltrating lymphocyte; RT, radiotherapy.

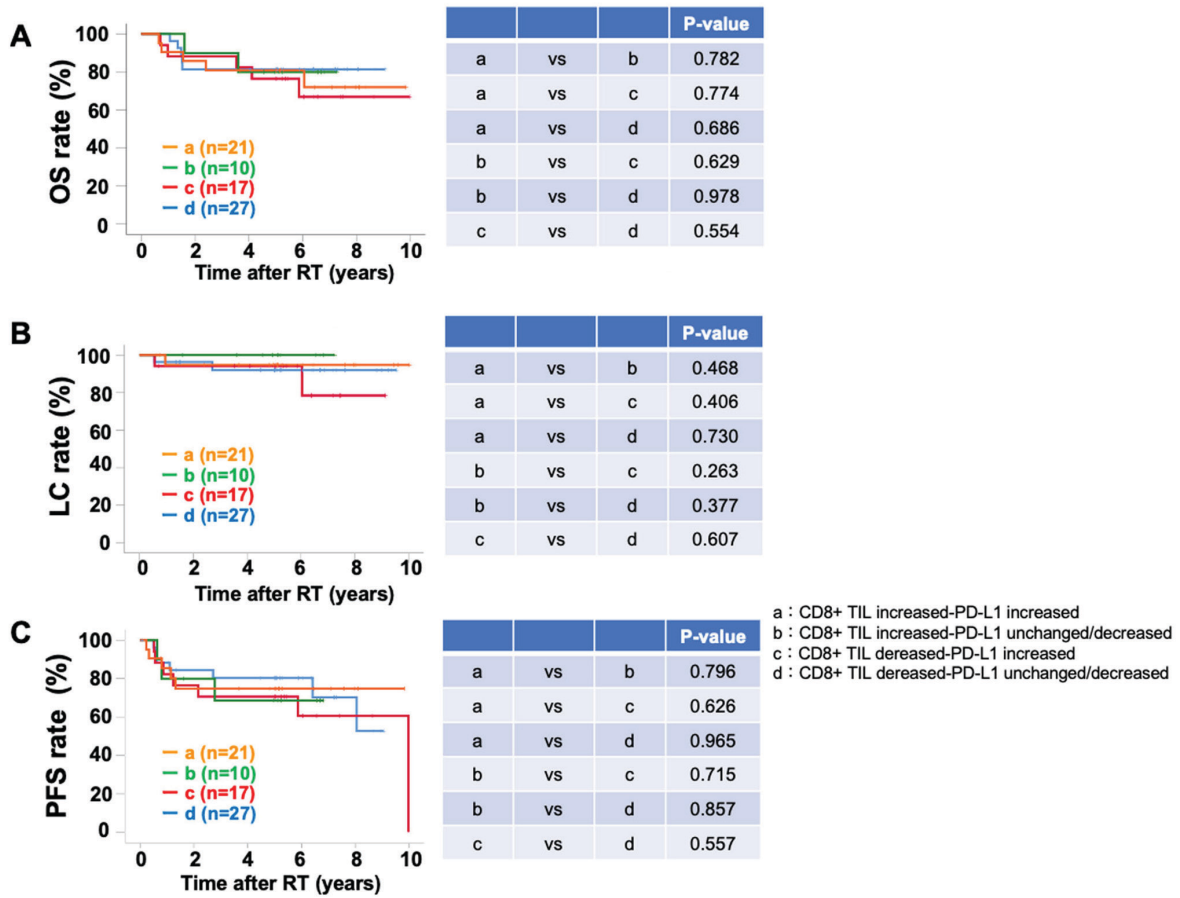

Table SI. Days from the beginning of RT to post-10 Gy biopsies.

| Days from the beginning of RT to biopsy | RT alone, n (%) | CRT, n (%) |
|-----------------------------------------|-----------------|------------|
| 5                                       | 0 (0.0)         | 1 (2.1)    |
| 7                                       | 1 (3.7)         | 1 (2.1)    |
| 8                                       | 18 (66.7)       | 35 (72.9)  |
| 9                                       | 6 (22.2)        | 11 (22.9)  |
| 11                                      | 2 (7.4)         | 0 (0.0)    |

CRT, chemoradiotherapy; RT, radiotherapy.

Table SII. Days from 10 Gy RT to biopsy of post-10 Gy samples.

| Days from 10 Gy RT to biopsy | Patients, n (%) |
|------------------------------|-----------------|
| 0                            | 4 (5.3)         |
| 1                            | 56 (74.7)       |
| 2                            | 4 (5.3)         |
| 3                            | 9 (12.0)        |
| 4                            | 2 (2.7)         |

RT, radiotherapy.
